# Supplementary material for: The interaction between suction feeding performance and prey escape response determines feeding success in larval fish
Source: Oxford University Press journal article supplement (doi:10.1242/jeb.204834), 2019-01-01
Supplement: jeb204834supp.pdf [file jeb204834supp.pdf]

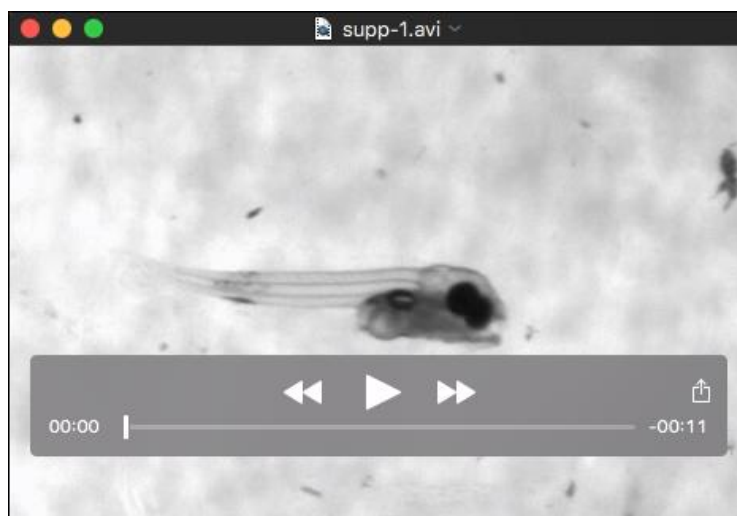

### Movie 1.

A 26 days post hatching (DPH) *Sparus auratus* larvae attempting to feed on a copepod, which escapes as the larvae strikes. the movie was recorded at 1000 frames per second (fps), and is played back at 30 fps
